# Supplementary material for: The Availability of Slow and Fast Calories in the Dutch Diet: The Current Situation and Opportunities for Interventions
Source: MDPI journal article supplement (doi:10.3390/foods6100087), 2017-10-02
Supplement: s1 [file s1]

Supplementary file

# The availability of slow and fast calories in the Dutch diet: The current situation and opportunities for interventions

Janet van den Boer, Melanie Werts, Els Siebelink, Cees de Graaf, Monica Mars

Table S1 A detailed description of the foods included in the dataset ( $n = 240$ ).

| Food                              | Food Group                  | Texture    | Source eating rate data | Portion size (g) | $n$ | Energy intake rate |          | Eating rate (g/min) | Energy density |           |
|-----------------------------------|-----------------------------|------------|-------------------------|------------------|-----|--------------------|----------|---------------------|----------------|-----------|
|                                   |                             |            |                         |                  |     | kJ/min             | kcal/min |                     | kJ/100g        | kcal/100g |
| Mineral water (Spa)               | Non-alcoholic beverages     | Liquid     | Current study           | 125              | 5   | 0 ± 0              | 0 ± 0    | 210 ± 53            | 0              | 0         |
| Water                             | Non-alcoholic beverages     | Liquid     | Current study           | 125              | 5   | 0 ± 0              | 0 ± 0    | 339 ± 219           | 0              | 0         |
| Tea                               | Non-alcoholic beverages     | Liquid     | Previous study          | 50               | 2   | 0 ± 0              | 0 ± 0    | 428 ± 165           | 0              | 0         |
| Cola light soft drink             | Non-alcoholic beverages     | Liquid     | Previous study          | 50               | 4   | 0 ± 0              | 0 ± 0    | 635 ± 508           | 0              | 0         |
| Coffee                            | Non-alcoholic beverages     | Liquid     | Current study           | 125              | 5   | 3 ± 1              | 1 ± 0    | 56 ± 14             | 5              | 1         |
| Bean sprouts boiled               | Vegetables                  | Hard-solid | Current study           | 50               | 5   | 10 ± 3             | 2 ± 1    | 13 ± 4              | 75             | 18        |
| Lettuce iceberg raw               | Vegetables                  | Hard-solid | Previous study          | 50               | 3   | 10 ± 6             | 2 ± 1    | 17 ± 9              | 62             | 15        |
| Chicory boiled                    | Vegetables                  | Soft-solid | Current study           | 50               | 5   | 15 ± 7             | 4 ± 2    | 21 ± 10             | 70             | 17        |
| Carrot raw                        | Vegetables                  | Hard-solid | Previous study          | 50               | 2   | 17 ± 10            | 4 ± 2    | 12 ± 7              | 139            | 33        |
| Cucumber with skin raw            | Vegetables                  | Hard-solid | Previous study          | 50               | 4   | 18 ± 9             | 4 ± 2    | 34 ± 17             | 54             | 13        |
| Leek boiled                       | Vegetables                  | Soft-solid | Current study           | 50               | 4   | 21 ± 10            | 5 ± 2    | 23 ± 11             | 91             | 22        |
| Cucumber without skin raw         | Vegetables                  | Hard-solid | Current study           | 50               | 5   | 22 ± 7             | 5 ± 2    | 43 ± 13             | 52             | 12        |
| Silver-skin onion sweet pickled   | Vegetables                  | Hard-solid | Current study           | 25               | 5   | 25 ± 5             | 6 ± 1    | 17 ± 3              | 142            | 34        |
| Cabbage oxheart boiled            | Vegetables                  | Soft-solid | Current study           | 50               | 5   | 27 ± 10            | 7 ± 2    | 31 ± 11             | 88             | 21        |
| Beans French boiled               | Vegetables                  | Soft-solid | Current study           | 50               | 5   | 31 ± 13            | 7 ± 3    | 29 ± 12             | 105            | 25        |
| Courgettes boiled                 | Vegetables                  | Soft-solid | Current study           | 50               | 5   | 31 ± 8             | 7 ± 2    | 39 ± 10             | 79             | 19        |
| Mushroom boiled                   | Vegetables                  | Soft-solid | Current study           | 50               | 4   | 33 ± 8             | 8 ± 2    | 36 ± 9              | 90             | 21        |
| Spinach frozen boiled             | Vegetables                  | Semi-solid | Current study           | 50               | 5   | 37 ± 30            | 9 ± 7    | 35 ± 28             | 104            | 25        |
| Rice waffle                       | Cereals and cereal products | Hard-solid | Previous study          | 50               | 2   | 37 ± 38            | 9 ± 9    | 2 ± 2               | 1587           | 374       |
| Stock from cube                   | Soups, bouillon             | Liquid     | Current study           | 75               | 4   | 38 ± 13            | 9 ± 3    | 174 ± 59            | 22             | 5         |
| Soup vegetable based dried packet | Soups, bouillon             | Liquid     | Current study           | 75               | 5   | 39 ± 11            | 9 ± 3    | 41 ± 12             | 95             | 23        |
| Celeriac boiled                   | Vegetables                  | Soft-solid | Current study           | 50               | 5   | 40 ± 20            | 9 ± 5    | 23 ± 11             | 175            | 42        |

|                                   |                                |            |                |     |     |          |         |         |      |     |
|-----------------------------------|--------------------------------|------------|----------------|-----|-----|----------|---------|---------|------|-----|
| Broccoli boiled                   | Vegetables                     | Soft-solid | Current study  | 50  | 5   | 47 ± 21  | 11 ± 5  | 42 ± 19 | 112  | 27  |
| Sweet pepper red boiled           | Vegetables                     | Soft-solid | Current study  | 50  | 5   | 48 ± 16  | 11 ± 4  | 42 ± 14 | 113  | 27  |
| Gherkins sweet pickled            | Vegetables                     | Hard-solid | Current study  | 50  | 5   | 49 ± 14  | 12 ± 3  | 43 ± 13 | 113  | 27  |
| Cauliflower boiled                | Vegetables                     | Soft-solid | Current study  | 50  | 5   | 58 ± 23  | 14 ± 6  | 61 ± 24 | 95   | 23  |
| Pear with skin                    | Fruits, nuts and olives        | Soft-solid | Current study  | 50  | 5   | 60 ± 15  | 14 ± 4  | 26 ± 7  | 231  | 55  |
| Peppermint                        | Sugar and confectionery        | Hard-solid | Current study  | 20  | 5   | 63 ± 44  | 15 ± 11 | 4 ± 3   | 1676 | 394 |
| Potatoes without skins<br>boiled  | Potatoes and other tubers      | Soft-solid | Previous study | 50  | 2   | 64 ± 24  | 15 ± 6  | 18 ± 7  | 352  | 83  |
| Boiled sweets                     | Sugar and confectionery        | Hard-solid | Current study  | 17  | 5   | 65 ± 62  | 16 ± 15 | 4 ± 4   | 1615 | 380 |
| Ham lean boiled                   | Meat and meat products         | Soft-solid | Previous study | 50  | 22  | 71 ± 32  | 17 ± 8  | 13 ± 6  | 564  | 135 |
| Tomato raw                        | Vegetables                     | Hard-solid | Previous study | 50  | 3   | 73 ± 19  | 17 ± 5  | 76 ± 20 | 96   | 23  |
| Soup portion                      | Soups, bouillon                | Liquid     | Current study  | 75  | 5   | 74 ± 13  | 18 ± 3  | 53 ± 9  | 140  | 33  |
| Crispbread wholemeal              | Cereals and cereal<br>products | Hard-solid | Current study  | 13  | 5   | 75 ± 15  | 18 ± 4  | 5 ± 1   | 1529 | 363 |
| Brussels sprouts boiled           | Vegetables                     | Soft-solid | Current study  | 50  | 5   | 76 ± 14  | 18 ± 3  | 40 ± 7  | 189  | 45  |
| Ketchup tomato                    | Condiments and sauces          | Semi-solid | Current study  | 25  | 4   | 78 ± 72  | 19 ± 17 | 24 ± 22 | 327  | 77  |
| Bread brown wheat                 | Cereals and cereal<br>products | Soft-solid | Previous study | 50  | 25  | 83 ± 25  | 20 ± 6  | 8 ± 3   | 1000 | 236 |
| Crispbakes Dutch<br>wholemeal     | Cereals and cereal<br>products | Hard-solid | Current study  | 13  | 5   | 87 ± 22  | 21 ± 5  | 5 ± 1   | 1664 | 394 |
| Potatoes boiled with skin         | Potatoes and other tubers      | Soft-solid | Current study  | 50  | 5   | 87 ± 30  | 21 ± 7  | 28 ± 10 | 311  | 74  |
| Apple without skin                | Fruits, nuts and olives        | Hard-solid | Previous study | 50  | 25  | 89 ± 25  | 21 ± 6  | 36 ± 10 | 247  | 58  |
| Breadsticks                       | Cereals and cereal<br>products | Hard-solid | Current study  | 13  | 5   | 89 ± 17  | 21 ± 4  | 5 ± 1   | 1694 | 401 |
| Ketchup curry                     | Condiments and sauces          | Semi-solid | Current study  | 25  | 4   | 91 ± 40  | 22 ± 9  | 17 ± 7  | 546  | 129 |
| Sandwich meat chicken             | Meat and meat products         | Soft-solid | Current study  | 30  | 5   | 92 ± 25  | 22 ± 6  | 18 ± 5  | 520  | 124 |
| Coffee cappuccino instant         | Non-alcoholic beverages        | Liquid     | Current study  | 125 | 4   | 92 ± 34  | 22 ± 8  | 59 ± 22 | 156  | 37  |
| Mandarins                         | Fruits, nuts and olives        | Soft-solid | Current study  | 50  | 5   | 93 ± 44  | 22 ± 10 | 48 ± 23 | 193  | 45  |
| Pear without skin                 | Fruits, nuts and olives        | Soft-solid | Current study  | 50  | 5   | 94 ± 36  | 22 ± 9  | 40 ± 16 | 232  | 55  |
| Apple with skin                   | Fruits, nuts and olives        | Hard-solid | Current study  | 50  | 174 | 96 ± 22  | 23 ± 5  | 38 ± 9  | 254  | 60  |
| Popcorn popped sweet              | Sugar and confectionery        | Hard-solid | Current study  | 13  | 6   | 99 ± 35  | 24 ± 8  | 6 ± 2   | 1649 | 389 |
| Bread wholemeal                   | Cereals and cereal<br>products | Soft-solid | Current study  | 35  | 174 | 99 ± 27  | 24 ± 6  | 10 ± 3  | 990  | 234 |
| Strawberries                      | Fruits, nuts and olives        | Soft-solid | Current study  | 50  | 5   | 99 ± 55  | 24 ± 13 | 81 ± 45 | 123  | 29  |
| Cocktail snacks Nibbits           | Cereals and cereal<br>products | Hard-solid | Current study  | 12  | 5   | 100 ± 31 | 24 ± 7  | 5 ± 2   | 2021 | 482 |
| Soup thickened with<br>vegetables | Soups, bouillon                | Semi-solid | Previous study | 50  | 4   | 104 ± 30 | 25 ± 7  | 70 ± 21 | 148  | 35  |

|                                                   |                             |            |                |     |   |          |         |          |      |     |
|---------------------------------------------------|-----------------------------|------------|----------------|-----|---|----------|---------|----------|------|-----|
| Low fat margarine on wholemeal bread              | Cereals and cereal products | Soft-solid | Current study  | 40  | 5 | 106 ± 51 | 25 ± 12 | 10 ± 5   | 1047 | 249 |
| Bread multigrain with seeds                       | Cereals and cereal products | Soft-solid | Current study  | 35  | 5 | 107 ± 23 | 25 ± 6  | 10 ± 2   | 1099 | 261 |
| Cabbage red with apple pieces frozen boiled       | Vegetables                  | Soft-solid | Current study  | 50  | 5 | 108 ± 46 | 26 ± 11 | 44 ± 19  | 247  | 59  |
| Tomato juice                                      | Non-alcoholic beverages     | Liquid     | Current study  | 125 | 5 | 109 ± 35 | 26 ± 8  | 160 ± 51 | 68   | 16  |
| Japanese rice cracker mix                         | Cereals and cereal products | Hard-solid | Current study  | 25  | 5 | 111 ± 20 | 26 ± 5  | 7 ± 1    | 1645 | 387 |
| Prawn crackers natural                            | Cereals and cereal products | Hard-solid | Current study  | 12  | 5 | 111 ± 42 | 26 ± 10 | 5 ± 2    | 2158 | 516 |
| Sauce tomato readymade                            | Condiments and sauces       | Semi-solid | Current study  | 25  | 5 | 111 ± 36 | 26 ± 9  | 44 ± 14  | 253  | 61  |
| Toast                                             | Cereals and cereal products | Hard-solid | Current study  | 17  | 5 | 112 ± 32 | 27 ± 8  | 7 ± 2    | 1522 | 359 |
| Peas fresh boiled                                 | Vegetables                  | Soft-solid | Previous study | 50  | 4 | 113 ± 71 | 27 ± 17 | 39 ± 24  | 291  | 69  |
| Soup clear with meat vegetables and noodles       | Soups, bouillon             | Semi-solid | Current study  | 75  | 5 | 114 ± 55 | 27 ± 13 | 66 ± 32  | 173  | 41  |
| Pork fillet                                       | Meat and meat products      | Soft-solid | Current study  | 50  | 5 | 117 ± 54 | 28 ± 13 | 18 ± 8   | 661  | 157 |
| Ice cream dairy cream based                       | Sugar and confectionery     | Semi-solid | Previous study | 50  | 4 | 117 ± 58 | 28 ± 14 | 14 ± 7   | 856  | 205 |
| Carrot boiled                                     | Vegetables                  | Soft-solid | Previous study | 50  | 3 | 119 ± 86 | 28 ± 21 | 89 ± 65  | 133  | 32  |
| Orange                                            | Fruits, nuts and olives     | Soft-solid | Current study  | 50  | 5 | 120 ± 50 | 29 ± 12 | 56 ± 23  | 215  | 51  |
| Olives ripe in brine                              | Fruits, nuts and olives     | Hard-solid | Current study  | 25  | 5 | 121 ± 36 | 29 ± 8  | 18 ± 5   | 663  | 162 |
| Cod prepared in microwave oven                    | Fish and shellfish          | Soft-solid | Current study  | 50  | 4 | 123 ± 34 | 30 ± 8  | 30 ± 8   | 414  | 98  |
| Beans brown tinned                                | Legumes                     | Soft-solid | Current study  | 50  | 5 | 129 ± 29 | 31 ± 7  | 28 ± 6   | 460  | 109 |
| Soup vegetable readymade                          | Soups, bouillon             | Semi-solid | Previous study | 50  | 4 | 132 ± 57 | 32 ± 14 | 67 ± 29  | 196  | 47  |
| Bread white water based                           | Cereals and cereal products | Soft-solid | Current study  | 35  | 5 | 133 ± 25 | 32 ± 6  | 13 ± 2   | 1046 | 247 |
| Ham shoulder medium fat boiled                    | Meat and meat products      | Soft-solid | Current study  | 40  | 5 | 139 ± 34 | 33 ± 8  | 25 ± 6   | 556  | 133 |
| Ham shoulder medium fat boiled on wholemeal bread | Cereals and cereal products | Soft-solid | Current study  | 60  | 5 | 140 ± 46 | 33 ± 11 | 16 ± 5   | 861  | 205 |
| Biscuit salted average                            | Cereals and cereal products | Hard-solid | Current study  | 25  | 5 | 140 ± 9  | 33 ± 2  | 7 ± 0    | 1975 | 472 |
| Winegum/fruitgum                                  | Sugar and confectionery     | Soft-solid | Current study  | 20  | 5 | 140 ± 33 | 33 ± 8  | 10 ± 2   | 1358 | 320 |

|                                          |                             |            |                |    |    |           |         |         |      |     |
|------------------------------------------|-----------------------------|------------|----------------|----|----|-----------|---------|---------|------|-----|
| Rice brown boiled                        | Cereals and cereal products | Soft-solid | Previous study | 50 | 3  | 142 ± 75  | 34 ± 18 | 26 ± 14 | 555  | 131 |
| Yoghurt low fat                          | Dairy products              | Semi-solid | Current study  | 75 | 5  | 146 ± 25  | 35 ± 6  | 94 ± 16 | 156  | 37  |
| Spinach creamed frozen boiled            | Vegetables                  | Semi-solid | Current study  | 50 | 5  | 153 ± 34  | 37 ± 8  | 51 ± 11 | 303  | 73  |
| Roll white hard                          | Cereals and cereal products | Hard-solid | Current study  | 35 | 4  | 153 ± 42  | 37 ± 10 | 13 ± 4  | 1173 | 277 |
| Pineapple in syrup                       | Fruits, nuts and olives     | Hard-solid | Current study  | 40 | 5  | 155 ± 36  | 37 ± 9  | 53 ± 12 | 291  | 69  |
| Roll brown hard                          | Cereals and cereal products | Hard-solid | Current study  | 35 | 5  | 155 ± 16  | 37 ± 4  | 13 ± 1  | 1177 | 278 |
| Ice cream stracciatella                  | Sugar and confectionery     | Semi-solid | Current study  | 50 | 5  | 156 ± 34  | 37 ± 8  | 16 ± 3  | 991  | 237 |
| Grapes with skin                         | Fruits, nuts and olives     | Hard-solid | Current study  | 50 | 5  | 156 ± 42  | 37 ± 10 | 47 ± 13 | 331  | 78  |
| Muesli with fruit                        | Cereals and cereal products | Hard-solid | Current study  | 25 | 5  | 156 ± 44  | 37 ± 10 | 10 ± 3  | 1505 | 357 |
| Crisps potato light unflavored           | Cereals and cereal products | Hard-solid | Current study  | 25 | 5  | 156 ± 54  | 37 ± 13 | 8 ± 3   | 2051 | 490 |
| Fromage frais low fat                    | Dairy products              | Semi-solid | Current study  | 75 | 4  | 157 ± 87  | 38 ± 21 | 63 ± 35 | 248  | 58  |
| Cheese Mozzarella on wholemeal bread     | Cereals and cereal products | Soft-solid | Current study  | 55 | 5  | 158 ± 70  | 38 ± 17 | 15 ± 7  | 1026 | 244 |
| Peaches in syrup                         | Fruits, nuts and olives     | Soft-solid | Current study  | 50 | 5  | 158 ± 100 | 38 ± 24 | 60 ± 38 | 263  | 62  |
| Toffees                                  | Sugar and confectionery     | Soft-solid | Previous study | 50 | 3  | 158 ± 58  | 38 ± 14 | 9 ± 3   | 1796 | 428 |
| Roll white soft                          | Cereals and cereal products | Soft-solid | Current study  | 25 | 5  | 163 ± 59  | 39 ± 14 | 15 ± 5  | 1108 | 262 |
| Liquorice Dutch type salted              | Sugar and confectionery     | Soft-solid | Current study  | 20 | 5  | 163 ± 51  | 39 ± 12 | 11 ± 4  | 1418 | 334 |
| Raisins dried                            | Fruits, nuts and olives     | Soft-solid | Current study  | 30 | 6  | 163 ± 38  | 39 ± 9  | 12 ± 3  | 1382 | 326 |
| Biscuit sweet                            | Cakes                       | Hard-solid | Current study  | 13 | 5  | 166 ± 51  | 40 ± 12 | 9 ± 3   | 1841 | 437 |
| Sandwich meat chicken on wholemeal bread | Cereals and cereal products | Soft-solid | Current study  | 60 | 5  | 168 ± 22  | 40 ± 5  | 20 ± 3  | 849  | 202 |
| Bread pita white                         | Cereals and cereal products | Hard-solid | Current study  | 25 | 5  | 169 ± 34  | 40 ± 8  | 16 ± 3  | 1040 | 245 |
| Banana                                   | Fruits, nuts and olives     | Soft-solid | Previous study | 50 | 25 | 171 ± 55  | 41 ± 13 | 43 ± 14 | 401  | 95  |
| Margarine 80% fat on wholemeal bread     | Cereals and cereal products | Soft-solid | Current study  | 40 | 5  | 171 ± 55  | 41 ± 13 | 14 ± 4  | 1237 | 295 |
| Eggs chicken boiled                      | Eggs and egg products       | Soft-solid | Previous study | 50 | 24 | 173 ± 72  | 41 ± 17 | 32 ± 13 | 535  | 128 |
| Roll brown soft                          | Cereals and cereal products | Soft-solid | Current study  | 30 | 5  | 175 ± 35  | 42 ± 8  | 16 ± 3  | 1087 | 258 |
| Crackers cream                           | Cereals and cereal          | Hard-solid | Previous study | 50 | 3  | 175 ± 19  | 42 ± 5  | 9 ± 1   | 1973 | 469 |

|                                                |                                     |            |                |     |     |           |         |          |      |     |
|------------------------------------------------|-------------------------------------|------------|----------------|-----|-----|-----------|---------|----------|------|-----|
| Pineapple                                      | products<br>Fruits, nuts and olives | Hard-solid | Previous study | 50  | 2   | 176 ± 112 | 42 ± 27 | 73 ± 46  | 242  | 57  |
| Wrap/Tortilla                                  | Cereals and cereal<br>products      | Soft-solid | Current study  | 40  | 5   | 176 ± 61  | 42 ± 15 | 13 ± 5   | 1349 | 320 |
| Beans baked in tomato<br>sauce tinned          | Legumes                             | Soft-solid | Current study  | 50  | 4   | 176 ± 75  | 42 ± 18 | 45 ± 19  | 393  | 93  |
| Herring salted                                 | Fish and shellfish                  | Soft-solid | Current study  | 60  | 5   | 176 ± 80  | 42 ± 19 | 24 ± 11  | 720  | 172 |
| Biscuit sponge fingers                         | Cakes                               | Hard-solid | Current study  | 12  | 5   | 177 ± 34  | 42 ± 8  | 10 ± 2   | 1702 | 402 |
| Crisps tortilla unflavored                     | Cereals and cereal<br>products      | Hard-solid | Current study  | 25  | 5   | 178 ± 34  | 43 ± 8  | 9 ± 2    | 2039 | 487 |
| Biscuit fruit                                  | Cakes                               | Hard-solid | Current study  | 15  | 5   | 179 ± 18  | 43 ± 4  | 11 ± 1   | 1662 | 393 |
| Cheese Gouda 48+                               | Dairy products                      | Soft-solid | Previous study | 50  | 24  | 179 ± 67  | 43 ± 16 | 12 ± 4   | 1529 | 369 |
| Potatoes mashed                                | Potatoes and other tubers           | Soft-solid | Previous study | 50  | 3   | 183 ± 152 | 44 ± 36 | 52 ± 44  | 349  | 83  |
| Muesli crunchy                                 | Cereals and cereal<br>products      | Hard-solid | Current study  | 25  | 5   | 185 ± 32  | 44 ± 8  | 10 ± 2   | 1841 | 438 |
| Chocolate plain                                | Sugar and confectionery             | Hard-solid | Current study  | 35  | 5   | 185 ± 78  | 44 ± 19 | 8 ± 4    | 2209 | 531 |
| Cake sponge Dutch<br>Eierkoek                  | Cakes                               | Soft-solid | Current study  | 15  | 5   | 185 ± 36  | 44 ± 9  | 14 ± 3   | 1314 | 310 |
| Bread ciabatta no filling                      | Cereals and cereal<br>products      | Hard-solid | Current study  | 50  | 5   | 188 ± 19  | 45 ± 5  | 17 ± 2   | 1079 | 255 |
| Biscuit brown/wholemeal                        | Cakes                               | Hard-solid | Current study  | 17  | 5   | 190 ± 25  | 45 ± 6  | 10 ± 1   | 1928 | 459 |
| Potato crisps oven baked                       | Cereals and cereal<br>products      | Hard-solid | Current study  | 25  | 5   | 191 ± 96  | 46 ± 23 | 11 ± 6   | 1731 | 411 |
| Beer pilsner                                   | Alcoholic beverages                 | Liquid     | Previous study | 125 | 24  | 198 ± 128 | 47 ± 31 | 106 ± 69 | 187  | 45  |
| Soup legume based<br>readymade                 | Soups, bouillon                     | Semi-solid | Current study  | 75  | 5   | 199 ± 47  | 47 ± 11 | 59 ± 14  | 337  | 80  |
| Hot chocolate                                  | Dairy products                      | Liquid     | Current study  | 125 | 5   | 200 ± 139 | 48 ± 33 | 71 ± 50  | 280  | 66  |
| Pork schnitzel breaded                         | Meat and meat products              | Hard-solid | Current study  | 50  | 4   | 204 ± 49  | 49 ± 12 | 26 ± 6   | 788  | 188 |
| Beef steak tartare                             | Meat and meat products              | Soft-solid | Current study  | 40  | 5   | 204 ± 52  | 49 ± 12 | 26 ± 7   | 782  | 186 |
| Spring roll fried                              | Miscellaneous                       | Hard-solid | Current study  | 25  | 5   | 204 ± 52  | 49 ± 12 | 27 ± 7   | 757  | 181 |
| Cashew nuts unsalted                           | Fruits, nuts and olives             | Hard-solid | Current study  | 50  | 5   | 206 ± 81  | 49 ± 19 | 8 ± 3    | 2552 | 615 |
| Sandwich spread original<br>on wholemeal bread | Condiments and sauces               | Soft-solid | Current study  | 55  | 5   | 207 ± 48  | 49 ± 12 | 21 ± 5   | 975  | 235 |
| Sauce for chips 25% oil                        | Condiments and sauces               | Semi-solid | Current study  | 25  | 5   | 213 ± 243 | 51 ± 58 | 17 ± 20  | 1226 | 296 |
| Yoghurt half fat                               | Dairy products                      | Semi-solid | Current study  | 75  | 174 | 215 ± 55  | 51 ± 13 | 102 ± 26 | 212  | 50  |
| Tortellini boiled                              | Cereals and cereal<br>products      | Soft-solid | Current study  | 50  | 5   | 216 ± 80  | 52 ± 19 | 33 ± 12  | 656  | 155 |
| Cheese 30+ on wholemeal                        | Cereals and cereal                  | Soft-solid | Current study  | 60  | 5   | 217 ± 47  | 52 ± 11 | 20 ± 4   | 1094 | 261 |

|                                                                |                             |            |                |    |    |           |         |         |      |     |
|----------------------------------------------------------------|-----------------------------|------------|----------------|----|----|-----------|---------|---------|------|-----|
| bread                                                          | products                    |            |                |    |    |           |         |         |      |     |
| White fish fillet in batter deep-fried                         | Fish and shellfish          | Hard-solid | Current study  | 50 | 5  | 221 ± 88  | 53 ± 21 | 25 ± 10 | 883  | 211 |
| Potato slices fried                                            | Potatoes and other tubers   | Soft-solid | Current study  | 50 | 5  | 223 ± 51  | 53 ± 12 | 28 ± 7  | 789  | 189 |
| Cultured confetti fruit-flavored on wholemeal bread            | Cereals and cereal products | Hard-solid | Current study  | 55 | 4  | 224 ± 110 | 54 ± 26 | 19 ± 9  | 1192 | 282 |
| Biscuit fortified with currants (LigaEvergreen)                | Cakes                       | Hard-solid | Current study  | 20 | 4  | 229 ± 93  | 55 ± 22 | 14 ± 6  | 1643 | 390 |
| Yoghurt vanilla half fat                                       | Dairy products              | Semi-solid | Current study  | 75 | 5  | 231 ± 100 | 55 ± 24 | 70 ± 30 | 330  | 78  |
| Bun wholemeal with muesli                                      | Cereals and cereal products | Hard-solid | Current study  | 35 | 5  | 231 ± 32  | 55 ± 8  | 19 ± 3  | 1221 | 290 |
| Cheese spread 48+ on wholemeal bread                           | Cereals and cereal products | Soft-solid | Current study  | 55 | 5  | 234 ± 57  | 56 ± 14 | 23 ± 6  | 1032 | 246 |
| Chicken fillet                                                 | Meat and meat products      | Soft-solid | Previous study | 50 | 4  | 234 ± 134 | 56 ± 32 | 35 ± 20 | 667  | 158 |
| Biscuit spiced Speculaas                                       | Cakes                       | Hard-solid | Previous study | 50 | 25 | 235 ± 71  | 56 ± 17 | 12 ± 4  | 1993 | 475 |
| Chocolate flakes plain on wholemeal bread                      | Cereals and cereal products | Hard-solid | Current study  | 55 | 4  | 236 ± 80  | 56 ± 19 | 19 ± 6  | 1245 | 296 |
| Beef steak tartare spiced (filet americain) on wholemeal bread | Cereals and cereal products | Soft-solid | Current study  | 55 | 5  | 238 ± 58  | 57 ± 14 | 24 ± 6  | 1009 | 240 |
| Biscuit fortified (Liga Milkbreak)                             | Cakes                       | Hard-solid | Current study  | 20 | 5  | 238 ± 38  | 57 ± 9  | 13 ± 2  | 1863 | 444 |
| Cake Dutch spiced (Ontbijtkoek)                                | Cakes                       | Soft-solid | Previous study | 50 | 25 | 239 ± 77  | 57 ± 18 | 18 ± 6  | 1305 | 308 |
| Candy bar Snickers                                             | Sugar and confectionery     | Hard-solid | Current study  | 37 | 5  | 239 ± 79  | 57 ± 19 | 12 ± 4  | 2029 | 484 |
| Cheese 30+                                                     | Dairy products              | Soft-solid | Current study  | 50 | 5  | 241 ± 213 | 58 ± 51 | 20 ± 18 | 1203 | 289 |
| Salami sausage saveloy on wholemeal bread                      | Cereals and cereal products | Soft-solid | Current study  | 60 | 5  | 245 ± 138 | 59 ± 33 | 21 ± 12 | 1189 | 284 |
| Marsh mallows                                                  | Sugar and confectionery     | Soft-solid | Current study  | 25 | 5  | 249 ± 109 | 60 ± 26 | 18 ± 8  | 1402 | 330 |
| Peanuts coated                                                 | Fruits, nuts and olives     | Hard-solid | Current study  | 25 | 5  | 251 ± 109 | 60 ± 26 | 11 ± 5  | 2251 | 540 |
| Cheese Brie 60+ on wholemeal bread                             | Cereals and cereal products | Soft-solid | Current study  | 60 | 5  | 252 ± 27  | 60 ± 7  | 21 ± 2  | 1185 | 283 |
| Crisps potato                                                  | Cereals and cereal products | Hard-solid | Current study  | 25 | 4  | 252 ± 72  | 60 ± 17 | 11 ± 3  | 2261 | 542 |
| Salmon prepared in microwave oven                              | Fish and shellfish          | Soft-solid | Current study  | 40 | 5  | 254 ± 75  | 61 ± 18 | 28 ± 8  | 918  | 220 |
| Minced beef/pork shallow                                       | Meat and meat products      | Soft-solid | Current study  | 50 | 5  | 254 ± 165 | 61 ± 39 | 19 ± 12 | 1322 | 317 |

|                                                |                             |            |                |    |   |           |         |         |      |     |
|------------------------------------------------|-----------------------------|------------|----------------|----|---|-----------|---------|---------|------|-----|
| fried                                          |                             |            |                |    |   |           |         |         |      |     |
| Cake Dutch spiced (Ontbijtkoek) wholemeal      | Cakes                       | Soft-solid | Current study  | 30 | 5 | 256 ± 77  | 61 ± 18 | 20 ± 6  | 1303 | 308 |
| Tuna in oil tinned                             | Fish and shellfish          | Soft-solid | Current study  | 50 | 5 | 256 ± 58  | 61 ± 14 | 30 ± 7  | 862  | 206 |
| Cheese cream soft (Boursin) on wholemeal bread | Cereals and cereal products | Soft-solid | Current study  | 50 | 5 | 257 ± 53  | 62 ± 13 | 21 ± 4  | 1202 | 287 |
| Crisps potato light flavored                   | Cereals and cereal products | Hard-solid | Previous study | 50 | 5 | 258 ± 138 | 62 ± 33 | 13 ± 7  | 2015 | 481 |
| Biscuit Dutch (Krakeling)                      | Cakes                       | Hard-solid | Current study  | 17 | 5 | 263 ± 53  | 63 ± 13 | 13 ± 3  | 2075 | 496 |
| Cheese Mozzarella                              | Dairy products              | Soft-solid | Current study  | 35 | 5 | 264 ± 117 | 63 ± 28 | 24 ± 11 | 1089 | 262 |
| Liquorice Dutch sweet                          | Sugar and confectionery     | Soft-solid | Previous study | 50 | 3 | 273 ± 92  | 65 ± 22 | 19 ± 6  | 1437 | 338 |
| Chips oven frozen prepared                     | Potatoes and other tubers   | Hard-solid | Previous study | 50 | 3 | 276 ± 205 | 66 ± 49 | 22 ± 17 | 1231 | 293 |
| Syrup apple on wholemeal bread                 | Cereals and cereal products | Soft-solid | Current study  | 55 | 4 | 276 ± 92  | 66 ± 22 | 26 ± 9  | 1061 | 251 |
| Hamburger prepared                             | Meat and meat products      | Soft-solid | Current study  | 40 | 5 | 277 ± 75  | 66 ± 18 | 26 ± 7  | 1062 | 255 |
| Liquorice allsorts                             | Sugar and confectionery     | Soft-solid | Current study  | 20 | 5 | 278 ± 57  | 66 ± 14 | 17 ± 3  | 1665 | 394 |
| Kiwi fruit green                               | Fruits, nuts and olives     | Soft-solid | Current study  | 50 | 5 | 278 ± 80  | 67 ± 19 | 97 ± 28 | 286  | 68  |
| Cheese Brie 60+                                | Dairy products              | Soft-solid | Current study  | 50 | 6 | 279 ± 121 | 67 ± 29 | 18 ± 8  | 1529 | 369 |
| Pasta wholemeal boiled                         | Cereals and cereal products | Soft-solid | Previous study | 50 | 2 | 286 ± 26  | 68 ± 6  | 52 ± 5  | 555  | 131 |
| Chocolate confetti plain on wholemeal bread    | Cereals and cereal products | Hard-solid | Current study  | 55 | 6 | 287 ± 99  | 69 ± 24 | 23 ± 8  | 1251 | 297 |
| Bun currant/raisin                             | Cereals and cereal products | Soft-solid | Current study  | 35 | 6 | 293 ± 65  | 70 ± 16 | 26 ± 6  | 1134 | 268 |
| Sausage luncheon meat on wholemeal bread       | Cereals and cereal products | Soft-solid | Current study  | 60 | 5 | 294 ± 75  | 70 ± 18 | 27 ± 7  | 1102 | 263 |
| Croissant                                      | Cakes                       | Hard-solid | Current study  | 27 | 5 | 299 ± 89  | 71 ± 21 | 18 ± 5  | 1684 | 403 |
| Jam on wholemeal bread                         | Cereals and cereal products | Soft-solid | Current study  | 55 | 5 | 301 ± 58  | 72 ± 14 | 29 ± 6  | 1026 | 243 |
| Peanut butter on wholemeal bread               | Cereals and cereal products | Soft-solid | Current study  | 55 | 5 | 303 ± 105 | 72 ± 25 | 20 ± 7  | 1481 | 355 |
| Rice white boiled                              | Cereals and cereal products | Soft-solid | Previous study | 50 | 4 | 304 ± 232 | 73 ± 55 | 49 ± 37 | 621  | 146 |
| Mayonnaise                                     | Condiments and sauces       | Semi-solid | Current study  | 25 | 3 | 307 ± 171 | 73 ± 41 | 11 ± 6  | 2733 | 664 |
| Spread chocolate hazelnut on wholemeal bread   | Cereals and cereal products | Soft-solid | Current study  | 55 | 5 | 307 ± 146 | 73 ± 35 | 22 ± 11 | 1376 | 328 |

|                                       |                             |            |                |     |    |           |         |           |      |     |
|---------------------------------------|-----------------------------|------------|----------------|-----|----|-----------|---------|-----------|------|-----|
| Chicken nuggets prepared in oven      | Meat and meat products      | Hard-solid | Current study  | 40  | 5  | 307 ± 115 | 73 ± 27 | 28 ± 11   | 1083 | 259 |
| Yoghurt low fat with fruit            | Dairy products              | Semi-solid | Current study  | 75  | 5  | 308 ± 73  | 74 ± 18 | 103 ± 24  | 300  | 71  |
| Chips fried in liquid frying fat      | Potatoes and other tubers   | Hard-solid | Current study  | 50  | 5  | 308 ± 41  | 74 ± 10 | 24 ± 3    | 1300 | 311 |
| Sausage luncheon meat                 | Meat and meat products      | Soft-solid | Current study  | 40  | 5  | 309 ± 172 | 74 ± 41 | 24 ± 13   | 1280 | 309 |
| Yoghurt full fat                      | Dairy products              | Semi-solid | Current study  | 75  | 6  | 319 ± 112 | 76 ± 27 | 132 ± 46  | 242  | 58  |
| Peanut sauce ready to eat             | Condiments and sauces       | Semi-solid | Current study  | 25  | 6  | 321 ± 95  | 77 ± 23 | 31 ± 9    | 1039 | 249 |
| Liver pate sausage on wholemeal bread | Cereals and cereal products | Soft-solid | Current study  | 55  | 5  | 322 ± 117 | 77 ± 28 | 29 ± 11   | 1097 | 262 |
| Sausage pork (Braadworst)             | Meat and meat products      | Soft-solid | Current study  | 50  | 5  | 333 ± 151 | 80 ± 36 | 33 ± 15   | 1025 | 246 |
| Mousse chocolate                      | Dairy products              | Semi-solid | Current study  | 75  | 4  | 334 ± 130 | 80 ± 31 | 44 ± 17   | 763  | 182 |
| Salami sausage saveloy                | Meat and meat products      | Soft-solid | Current study  | 50  | 6  | 334 ± 204 | 80 ± 49 | 22 ± 13   | 1541 | 372 |
| Bread white with sugar (Suikerbrood)  | Cereals and cereal products | Soft-solid | Current study  | 35  | 5  | 336 ± 66  | 80 ± 16 | 26 ± 5    | 1291 | 305 |
| Buttermilk                            | Dairy products              | Liquid     | Previous study | 125 | 25 | 336 ± 308 | 80 ± 74 | 262 ± 241 | 128  | 30  |
| Energy drink (Red Bull)               | Non-alcoholic beverages     | Liquid     | Current study  | 125 | 5  | 338 ± 195 | 81 ± 47 | 181 ± 104 | 187  | 44  |
| Chocolate chip cookie                 | Cakes                       | Hard-solid | Current study  | 38  | 5  | 341 ± 39  | 81 ± 9  | 16 ± 2    | 2120 | 506 |
| Meringue cake (Bokkenpootje)          | Cakes                       | Hard-solid | Current study  | 25  | 5  | 342 ± 50  | 82 ± 12 | 18 ± 3    | 1903 | 454 |
| Chocolates filled/Belgium chocolate   | Sugar and confectionery     | Soft-solid | Current study  | 50  | 5  | 348 ± 93  | 83 ± 22 | 16 ± 4    | 2136 | 512 |
| Candy bar Twix                        | Sugar and confectionery     | Hard-solid | Current study  | 20  | 5  | 354 ± 108 | 85 ± 26 | 17 ± 5    | 2071 | 495 |
| Biscuit Dutch shortbread sprits       | Cakes                       | Hard-solid | Current study  | 25  | 5  | 355 ± 53  | 85 ± 13 | 16 ± 2    | 2205 | 527 |
| Sausage (Frikandel) deep-fried        | Meat and meat products      | Soft-solid | Current study  | 37  | 5  | 357 ± 166 | 85 ± 40 | 34 ± 16   | 1049 | 252 |
| Waffle Luikse                         | Cakes                       | Soft-solid | Current study  | 30  | 5  | 358 ± 228 | 85 ± 54 | 19 ± 12   | 1868 | 446 |
| Candy bar (Milky Way)                 | Sugar and confectionery     | Hard-solid | Current study  | 30  | 5  | 368 ± 147 | 88 ± 35 | 20 ± 8    | 1883 | 448 |
| Peanuts salted                        | Fruits, nuts and olives     | Hard-solid | Previous study | 50  | 4  | 370 ± 173 | 88 ± 41 | 14 ± 7    | 2586 | 624 |
| Salmon smoked                         | Fish and shellfish          | Soft-solid | Previous study | 50  | 3  | 372 ± 249 | 89 ± 59 | 48 ± 32   | 771  | 185 |
| Yoghurt drink with sweetener          | Dairy products              | Liquid     | Previous study | 50  | 4  | 375 ± 312 | 90 ± 75 | 307 ± 256 | 122  | 29  |
| Eclair with whipped cream filling     | Cakes                       | Soft-solid | Current study  | 40  | 5  | 378 ± 157 | 90 ± 38 | 32 ± 13   | 1186 | 286 |
| Bacon rasher                          | Meat and meat products      | Soft-solid | Current study  | 40  | 5  | 381 ± 102 | 91 ± 24 | 21 ± 6    | 1804 | 435 |
| Chocolate bar milk with nuts          | Sugar and confectionery     | Hard-solid | Current study  | 25  | 5  | 386 ± 168 | 92 ± 40 | 16 ± 7    | 2342 | 562 |



|                                             |                             |            |                |     |    |           |           |           |      |     |
|---------------------------------------------|-----------------------------|------------|----------------|-----|----|-----------|-----------|-----------|------|-----|
| Croissant with ham and cheese               | Miscellaneous               | Hard-solid | Current study  | 45  | 5  | 401 ± 125 | 96 ± 30   | 27 ± 9    | 1460 | 350 |
| Croquette meat deep-fried in liquid fat     | Miscellaneous               | Hard-solid | Current study  | 40  | 5  | 410 ± 84  | 98 ± 20   | 36 ± 7    | 1139 | 273 |
| Pudding airy                                | Dairy products              | Semi-solid | Current study  | 75  | 6  | 413 ± 147 | 99 ± 35   | 43 ± 15   | 967  | 231 |
| Sausage frankfurter tinned                  | Meat and meat products      | Soft-solid | Current study  | 40  | 4  | 415 ± 112 | 99 ± 27   | 50 ± 13   | 837  | 201 |
| Cashew nuts salted                          | Fruits, nuts and olives     | Hard-solid | Previous study | 50  | 2  | 438 ± 373 | 105 ± 89  | 17 ± 15   | 2552 | 615 |
| Roll bapao                                  | Miscellaneous               | Soft-solid | Current study  | 60  | 5  | 440 ± 128 | 105 ± 30  | 38 ± 11   | 1152 | 273 |
| Ice tea (non-sparkling)                     | Non-alcoholic beverages     | Liquid     | Current study  | 125 | 5  | 454 ± 105 | 109 ± 25  | 344 ± 79  | 132  | 31  |
| Snack sausage roll with bread dough pastry  | Miscellaneous               | Hard-solid | Current study  | 40  | 5  | 459 ± 55  | 110 ± 13  | 29 ± 3    | 1596 | 382 |
| Sausage smoked traditional cooked           | Meat and meat products      | Soft-solid | Current study  | 50  | 5  | 463 ± 135 | 111 ± 32  | 36 ± 10   | 1287 | 311 |
| Chocolate milk                              | Sugar and confectionery     | Hard-solid | Previous study | 50  | 4  | 464 ± 184 | 111 ± 44  | 20 ± 8    | 2286 | 548 |
| Custard vanilla full fat                    | Dairy products              | Semi-solid | Previous study | 50  | 4  | 472 ± 213 | 113 ± 51  | 121 ± 55  | 390  | 93  |
| Cream slice Dutch (Tompouce)                | Cakes                       | Hard-solid | Current study  | 45  | 5  | 472 ± 138 | 113 ± 33  | 39 ± 11   | 1208 | 288 |
| Pancake prepared with margarine             | Cakes                       | Soft-solid | Current study  | 65  | 5  | 478 ± 211 | 114 ± 50  | 58 ± 26   | 826  | 196 |
| Apple sauce                                 | Fruits, nuts and olives     | Semi-solid | Previous study | 50  | 3  | 479 ± 307 | 115 ± 73  | 147 ± 95  | 325  | 77  |
| Cream whipped with added sugar              | Dairy products              | Semi-solid | Current study  | 25  | 5  | 479 ± 212 | 115 ± 51  | 33 ± 15   | 1453 | 351 |
| Custard chocolate full fat                  | Dairy products              | Semi-solid | Current study  | 75  | 4  | 512 ± 159 | 122 ± 38  | 122 ± 38  | 419  | 100 |
| Apple pie Dutch with shortbread             | Cakes                       | Soft-solid | Current study  | 50  | 5  | 531 ± 104 | 127 ± 25  | 50 ± 10   | 1064 | 253 |
| Ice tea (sparkling)                         | Non-alcoholic beverages     | Liquid     | Current study  | 125 | 4  | 546 ± 295 | 130 ± 70  | 414 ± 223 | 132  | 31  |
| Fromage frais half fat with fruit           | Dairy products              | Semi-solid | Current study  | 50  | 5  | 546 ± 185 | 131 ± 44  | 104 ± 35  | 523  | 124 |
| Dairy spread plain/herbs on wholemeal bread | Cereals and cereal products | Soft-solid | Current study  | 55  | 5  | 549 ± 802 | 131 ± 192 | 54 ± 78   | 1022 | 244 |
| Apple turnover with puff pastry             | Cakes                       | Hard-solid | Current study  | 55  | 5  | 552 ± 146 | 132 ± 35  | 37 ± 10   | 1506 | 361 |
| Milk semi-skimmed                           | Dairy products              | Liquid     | Previous study | 125 | 25 | 555 ± 383 | 133 ± 92  | 289 ± 200 | 192  | 46  |
| Cupcake iced                                | Cakes                       | Soft-solid | Current study  | 38  | 5  | 568 ± 93  | 136 ± 22  | 31 ± 5    | 1833 | 437 |
| Almond paste filled tarts                   | Cakes                       | Soft-solid | Current study  | 20  | 5  | 593 ± 234 | 142 ± 56  | 35 ± 14   | 1697 | 404 |
| Smoothie fruit                              | Non-alcoholic beverages     | Liquid     | Current study  | 125 | 5  | 594 ± 26  | 142 ± 6   | 257 ± 11  | 231  | 54  |
| Cake wrapped in marzipan and chocolate      | Cakes                       | Soft-solid | Current study  | 30  | 4  | 608 ± 239 | 145 ± 57  | 32 ± 13   | 1900 | 454 |

|                                         |                         |            |                |     |   |             |           |           |      |     |
|-----------------------------------------|-------------------------|------------|----------------|-----|---|-------------|-----------|-----------|------|-----|
| Fruit drink concentrate diluted         | Sugar and confectionery | Liquid     | Current study  | 125 | 5 | 610 ± 278   | 146 ± 66  | 268 ± 122 | 227  | 54  |
| Cake without butter                     | Cakes                   | Soft-solid | Previous study | 50  | 4 | 636 ± 303   | 152 ± 72  | 34 ± 16   | 1856 | 444 |
| Minced meat ball with egg/crumbs        | Meat and meat products  | Soft-solid | Previous study | 50  | 3 | 654 ± 109   | 156 ± 26  | 58 ± 10   | 1127 | 270 |
| Breakfast drink (Goede Morgen original) | Dairy products          | Liquid     | Current study  | 125 | 5 | 673 ± 135   | 161 ± 32  | 271 ± 55  | 248  | 59  |
| Waffle syrup                            | Cakes                   | Soft-solid | Previous study | 50  | 3 | 685 ± 387   | 164 ± 93  | 35 ± 20   | 1936 | 461 |
| Snack sausage roll puff pastry          | Miscellaneous           | Hard-solid | Current study  | 37  | 5 | 761 ± 275   | 182 ± 66  | 51 ± 19   | 1484 | 356 |
| Milk skimmed                            | Dairy products          | Liquid     | Current study  | 125 | 5 | 786 ± 97    | 188 ± 23  | 527 ± 65  | 149  | 35  |
| Yoghurt drink                           | Dairy products          | Liquid     | Current study  | 125 | 5 | 793 ± 296   | 190 ± 71  | 330 ± 123 | 240  | 57  |
| Milk whole                              | Dairy products          | Liquid     | Current study  | 125 | 5 | 961 ± 567   | 230 ± 136 | 373 ± 220 | 258  | 62  |
| Juice orange pasteurized                | Non-alcoholic beverages | Liquid     | Current study  | 125 | 5 | 971 ± 598   | 232 ± 143 | 511 ± 315 | 190  | 45  |
| Juice orange freshly squeezed           | Non-alcoholic beverages | Liquid     | Current study  | 125 | 5 | 1004 ± 468  | 240 ± 112 | 483 ± 225 | 208  | 49  |
| Milk chocolate-flavored semi-skimmed    | Dairy products          | Liquid     | Current study  | 125 | 5 | 1044 ± 307  | 249 ± 73  | 319 ± 94  | 327  | 77  |
| Juice apple                             | Non-alcoholic beverages | Liquid     | Previous study | 50  | 2 | 1243 ± 175  | 297 ± 42  | 641 ± 90  | 194  | 46  |
| Breakfast drink (HeroFruitontbijt)      | Non-alcoholic beverages | Liquid     | Previous study | 50  | 4 | 1379 ± 1095 | 330 ± 262 | 595 ± 472 | 232  | 55  |
| Milk chocolate-flavored full fat        | Dairy products          | Liquid     | Previous study | 50  | 4 | 1766 ± 1388 | 422 ± 332 | 471 ± 370 | 375  | 89  |

**Table S2.** Frequency (*n* (%)) of food groups in the eating rate and energy intake rate quartiles (*n* = 240).

| Food groups                 | Eating rate (g/min)                          |                                               |                                               |                                                   | <i>p</i> <sup>2</sup> | Energy intake rate (kJ/min) <sup>1</sup>       |                                                     |                                                  |                                                   | <i>p</i> <sup>2</sup> |
|-----------------------------|----------------------------------------------|-----------------------------------------------|-----------------------------------------------|---------------------------------------------------|-----------------------|------------------------------------------------|-----------------------------------------------------|--------------------------------------------------|---------------------------------------------------|-----------------------|
|                             | Quartile 1<br>2–16 g/min ( <i>n</i><br>= 60) | Quartile 2<br>16–26 g/min<br>( <i>n</i> = 60) | Quartile 3<br>26–50 g/min<br>( <i>n</i> = 60) | Quartile 4<br>50–641<br>g/min ( <i>n</i> =<br>60) |                       | Quartile 1<br>0–112 kJ/min<br>( <i>n</i> = 60) | Quartile 2<br>113–204<br>kJ/min ( <i>n</i> =<br>60) | Quartile 3<br>204–333<br>kJ/min ( <i>n</i> = 60) | Quartile 4<br>334–1766 kJ/min<br>( <i>n</i> = 60) |                       |
|                             |                                              |                                               |                                               |                                                   | <0.0001               |                                                |                                                     |                                                  |                                                   | <0.0001               |
| Potatoes                    | 0 (0.0)                                      | 3 (5.0)                                       | 2 (3.3)                                       | 1 (1.7)                                           |                       | 2 (3.3)                                        | 1 (1.7)                                             | 3 (5.0)                                          | 0 (0.0)                                           |                       |
| Vegetables                  | 2 (3.3)                                      | 5 (8.3)                                       | 13 (21.7)                                     | 4 (6.7)                                           |                       | 21 (35.0)                                      | 3 (5.0)                                             | 0 (0.0)                                          | 0 (0.0)                                           |                       |
| Legumes                     | 0 (0.0)                                      | 0 (0.0)                                       | 2 (3.3)                                       | 0 (0)                                             |                       | 0 (0)                                          | 2 (3.3)                                             | 0 (0)                                            | 0 (0)                                             |                       |
| Fruits, nuts and olives     | 4 (6.7)                                      | 3 (5.0)                                       | 6 (10.0)                                      | 7 (11.7)                                          |                       | 6 (10.0)                                       | 8 (13.3)                                            | 3 (5.0)                                          | 3 (5.0)                                           |                       |
| Dairy products              | 1 (1.7)                                      | 3 (5.0)                                       | 3 (5.0)                                       | 19 (31.7)                                         |                       | 0 (0.0)                                        | 4 (6.7)                                             | 7 (11.7)                                         | 15 (25.0)                                         |                       |
| Cereals and cereal products | 30 (50.0)                                    | 19 (31.7)                                     | 5 (8.3)                                       | 2 (3.3)                                           |                       | 12 (20.0)                                      | 20 (33.3)                                           | 22 (36.7)                                        | 2 (3.3)                                           |                       |
| Meat and meat products      | 1 (1.7)                                      | 8 (13.3)                                      | 8 (13.3)                                      | 1 (1.7)                                           |                       | 2 (3.3)                                        | 4 (6.7)                                             | 6 (10.0)                                         | 6 (10.0)                                          |                       |
| Fish and shellfish          | 0 (0.0)                                      | 2 (3.3)                                       | 4 (6.7)                                       | 0 (0.0)                                           |                       | 0 (0.0)                                        | 2 (3.3)                                             | 3 (5.0)                                          | 1 (1.7)                                           |                       |
| Eggs and egg products       | 0 (0.0)                                      | 0 (0.0)                                       | 1 (1.7)                                       | 0 (0.0)                                           |                       | 0 (0.0)                                        | 1 (1.7)                                             | 0 (0.0)                                          | 0 (0.0)                                           |                       |
| Sugar and confectionery     | 10 (16.7)                                    | 8 (13.3)                                      | 0 (0.0)                                       | 1 (1.7)                                           |                       | 3 (5.0)                                        | 6 (10.0)                                            | 4 (6.7)                                          | 6 (10.0)                                          |                       |
| Cakes                       | 11 (18.3)                                    | 5 (8.3)                                       | 8 (13.3)                                      | 2 (3.3)                                           |                       | 0 (0.0)                                        | 5 (8.3)                                             | 7 (11.7)                                         | 14 (23.3)                                         |                       |
| Non-alcoholic beverages     | 0 (0.0)                                      | 0 (0.0)                                       | 0 (0.0)                                       | 15 (25.0)                                         |                       | 7 (11.7)                                       | 0 (0.0)                                             | 0 (0.0)                                          | 8 (13.3)                                          |                       |
| Alcoholic beverages         | 0 (0.0)                                      | 0 (0.0)                                       | 0 (0.0)                                       | 1 (1.7)                                           |                       | 0 (0.0)                                        | 1 (1.7)                                             | 0 (0.0)                                          | 0 (0.0)                                           |                       |
| Condiments and sauces       | 1 (1.7)                                      | 4 (6.7)                                       | 2 (3.3)                                       | 0 (0.0)                                           |                       | 3 (5.0)                                        | 0 (0.0)                                             | 4 (6.7)                                          | 0 (0.0)                                           |                       |
| Soups, bouillon             | 0 (0.0)                                      | 0 (0.0)                                       | 1 (1.7)                                       | 6 (10.0)                                          |                       | 4 (6.7)                                        | 3 (5.0)                                             | 0 (0.0)                                          | 0 (0.0)                                           |                       |
| Snacks                      | 0 (0.0)                                      | 0 (0.0)                                       | 5 (8.3)                                       | 1 (1.7)                                           |                       | 0 (0)                                          | 0 (0)                                               | 1 (1.67)                                         | 5 (8.3)                                           |                       |

**Table S3** Characteristics (mean  $\pm$  SD) of the foods in the eating rate and energy intake rate quartiles ( $n = 240$ ): eating rate, energy intake rate, food composition and taste.

|                                     | Eating rate (g/min)     |                          |                          |                           | $p^2$   | Energy intake rate (kJ/min) <sup>1</sup> |                             |                             |                              | $p^2$   |
|-------------------------------------|-------------------------|--------------------------|--------------------------|---------------------------|---------|------------------------------------------|-----------------------------|-----------------------------|------------------------------|---------|
|                                     | Quartile 1              | Quartile 2               | Quartile 3               | Quartile 4                |         | Quartile 1                               | Quartile 2                  | Quartile 3                  | Quartile 4                   |         |
|                                     | 2–16 g/min ( $n = 60$ ) | 16–26 g/min ( $n = 60$ ) | 26–50 g/min ( $n = 60$ ) | 50–641 g/min ( $n = 60$ ) |         | 0–112 kJ/min ( $n = 60$ )                | 113–204 kJ/min ( $n = 60$ ) | 204–333 kJ/min ( $n = 60$ ) | 334–1766 kJ/min ( $n = 60$ ) |         |
| <b>Eating rate (g/min)</b>          | 11 $\pm$ 3              | 21 $\pm$ 3               | 36 $\pm$ 7               | 192 $\pm$ 170             | <0.0001 | 58 $\pm$ 106                             | 30 $\pm$ 25                 | 29 $\pm$ 24                 | 143 $\pm$ 173                | <0.0001 |
| <b>Energy intake rate</b>           |                         |                          |                          |                           | <0.0001 |                                          |                             |                             |                              | <0.0001 |
| kJ/min                              | 162 $\pm$ 76            | 230 $\pm$ 108            | 254 $\pm$ 183            | 398 $\pm$ 375             |         | 62 $\pm$ 36                              | 161 $\pm$ 25                | 262 $\pm$ 35                | 560 $\pm$ 278                |         |
| kcal/min                            | 39 $\pm$ 18             | 55 $\pm$ 26              | 61 $\pm$ 44              | 95 $\pm$ 90               |         | 15 $\pm$ 9                               | 38 $\pm$ 6                  | 63 $\pm$ 8                  | 134 $\pm$ 66                 |         |
| <b>Food composition</b>             |                         |                          |                          |                           |         |                                          |                             |                             |                              |         |
| Energy (kJ/100 g)                   | 1586 $\pm$ 545          | 1144 $\pm$ 582           | 747 $\pm$ 5552           | 285 $\pm$ 282             | <0.0001 | 500 $\pm$ 633                            | 951 $\pm$ 619               | 1226 $\pm$ 539              | 1086 $\pm$ 764               | <0.0001 |
| Protein (g/100 g)                   | 9 $\pm$ 5               | 10 $\pm$ 8               | 8 $\pm$ 8                | 3 $\pm$ 3                 | <0.0001 | 3 $\pm$ 5                                | 8 $\pm$ 7                   | 10 $\pm$ 8                  | 7 $\pm$ 7                    | <0.01   |
| Fat (g/100 g)                       | 14 $\pm$ 16             | 12 $\pm$ 12              | 9 $\pm$ 9                | 2 $\pm$ 4                 | <0.0001 | 2 $\pm$ 5                                | 7 $\pm$ 11                  | 14 $\pm$ 13                 | 14 $\pm$ 13                  | <0.0001 |
| Carbohydrate (g/100 g)              | 54 $\pm$ 24             | 30 $\pm$ 25              | 17 $\pm$ 17              | 9 $\pm$ 8                 | <0.0001 | 21 $\pm$ 29                              | 32 $\pm$ 27                 | 30 $\pm$ 24                 | 26 $\pm$ 22                  | 0.34    |
| Mono- and disaccharides (g/100 g)   | 17 $\pm$ 21             | 14 $\pm$ 19              | 8 $\pm$ 11               | 18 $\pm$ 94               | 0.93    | 7 $\pm$ 16                               | 23 $\pm$ 95                 | 12 $\pm$ 16                 | 16 $\pm$ 16                  | 0.54    |
| Polysaccharides (g/100 g)           | 37 $\pm$ 22             | 15 $\pm$ 14              | 9 $\pm$ 11               | 3 $\pm$ 6                 | <0.0001 | 14 $\pm$ 24                              | 21 $\pm$ 22                 | 19 $\pm$ 15                 | 10 $\pm$ 12                  | 0.15    |
| Fiber (g/100 g)                     | 4 $\pm$ 3               | 3 $\pm$ 2                | 2 $\pm$ 2                | 1 $\pm$ 1                 | <0.0001 | 2 $\pm$ 2                                | 3 $\pm$ 3                   | 3 $\pm$ 2                   | 1 $\pm$ 1                    | 0.02    |
| Water (g/100 g)                     | 19 $\pm$ 23             | 44 $\pm$ 26              | 64 $\pm$ 24              | 85 $\pm$ 14               | <0.0001 | 71 $\pm$ 35                              | 49 $\pm$ 32                 | 41 $\pm$ 24                 | 51 $\pm$ 32                  | <0.001  |
| Sodium (mg/100 g)                   | 361 $\pm$ 275           | 356 $\pm$ 300            | 258 $\pm$ 301            | 87 $\pm$ 142              | <0.0001 | 217 $\pm$ 302                            | 278 $\pm$ 277               | 333 $\pm$ 234               | 234 $\pm$ 309                | 0.53    |
| <b>Taste intensity <sup>3</sup></b> |                         |                          |                          |                           |         |                                          |                             |                             |                              |         |
| Sweet                               | 22 $\pm$ 19             | 24 $\pm$ 23              | 20 $\pm$ 20              | 23 $\pm$ 17               | 0.87    | 12 $\pm$ 12                              | 18 $\pm$ 17                 | 22 $\pm$ 20                 | 36 $\pm$ 21                  | <0.0001 |
| Sour                                | 4 $\pm$ 6               | 8 $\pm$ 12               | 9 $\pm$ 12               | 20 $\pm$ 18               | <0.0001 | 10 $\pm$ 14                              | 9 $\pm$ 13                  | 11 $\pm$ 16                 | 11 $\pm$ 14                  | 0.43    |
| Bitter                              | 2 $\pm$ 5               | 2 $\pm$ 3                | 2 $\pm$ 3                | 6 $\pm$ 13                | 0.01    | 5 $\pm$ 10                               | 3 $\pm$ 10                  | 2 $\pm$ 2                   | 3 $\pm$ 3                    | 0.09    |
| Umami                               | 5 $\pm$ 8               | 8 $\pm$ 9                | 11 $\pm$ 11              | 5 $\pm$ 9                 | 0.37    | 8 $\pm$ 11                               | 6 $\pm$ 9                   | 9 $\pm$ 10                  | 5 $\pm$ 9                    | 0.41    |
| Salt                                | 18 $\pm$ 15             | 18 $\pm$ 13              | 18 $\pm$ 18              | 10 $\pm$ 15               | <0.01   | 12 $\pm$ 15                              | 17 $\pm$ 16                 | 21 $\pm$ 14                 | 14 $\pm$ 16                  | 0.30    |
| Fat                                 | 22 $\pm$ 18             | 34 $\pm$ 19              | 29 $\pm$ 20              | 20 $\pm$ 15               | 0.28    | 12 $\pm$ 10                              | 21 $\pm$ 15                 | 36 $\pm$ 17                 | 37 $\pm$ 19                  | <0.0001 |

<sup>1</sup> Energy intake rate-quartiles (kcal/min); Quartile 1 = 0–27 kcal/min, Quartile 2 = 27–49 kcal/min, Quartile 3 = 49–80 kcal/min, Quartile 4 = 80–422 kcal/min; <sup>2</sup>  $p$ -value linear trend; <sup>3</sup>  $n = 225$ .

**Table S4** Energy intake rate (kcal/min) of foods relative to the other foods within the food group.

| Food group                               | Energy intake rate (kcal/min) relative to food group                               |                                                                     |                                                 |
|------------------------------------------|------------------------------------------------------------------------------------|---------------------------------------------------------------------|-------------------------------------------------|
|                                          | Low                                                                                | Medium                                                              | High                                            |
| Potatoes ( <i>n</i> = 6)                 |                                                                                    |                                                                     |                                                 |
| Description                              | Boiled potatoes <sup>1</sup> ( <i>n</i> = 2)                                       | Mashed and (deep-)fried potatoes ( <i>n</i> = 4)                    |                                                 |
| Energy intake rate <sup>1</sup>          | 18 (15–21) kcal/min                                                                | 59 (44–74) kcal/min                                                 |                                                 |
| Eating rate <sup>1</sup>                 | 23 (18–28) g/min                                                                   | 32 (22–52) g/min                                                    |                                                 |
| Energy density <sup>1</sup>              | 79 (74–83) kcal/100 g                                                              | 219 (83–311) kcal/100 g                                             |                                                 |
| Vegetables ( <i>n</i> = 24)              |                                                                                    |                                                                     |                                                 |
| Description                              | Raw vegetables <sup>1</sup> ( <i>n</i> = 5)                                        | Boiled <sup>1</sup> and pickled vegetables ( <i>n</i> = 17)         | Vegetables with added energy ( <i>n</i> = 2)    |
| Energy intake rate <sup>1</sup>          | 7 (2–17) kcal/min                                                                  | 11 (2–28) kcal/min                                                  | 31 (26–37) kcal/min                             |
| Eating rate <sup>1</sup>                 | 36 (12–76) g/min                                                                   | 37 (13–89) g/min                                                    | 48 (44–51) g/min                                |
| Energy density <sup>1</sup>              | 19 (12–33) kcal/100 g                                                              | 29 (17–69) kcal/100 g                                               | 66 (59–73) kcal/100 g                           |
| Legumes ( <i>n</i> = 2)                  |                                                                                    |                                                                     |                                                 |
| Description                              | Tinned brown beans <sup>1</sup> ( <i>n</i> = 1)                                    | Tinned beans in tomato sauce ( <i>n</i> = 1)                        |                                                 |
| Energy intake rate <sup>1</sup>          | 31 kcal/min                                                                        | 42 kcal/min                                                         |                                                 |
| Eating rate <sup>1</sup>                 | 28 g/min                                                                           | 45 g/min                                                            |                                                 |
| Energy density <sup>1</sup>              | 109 kcal/100 g                                                                     | 93 kcal/100 g                                                       |                                                 |
| Fruits, nuts and olives ( <i>n</i> = 20) |                                                                                    |                                                                     |                                                 |
| Description                              | Fruit (excluding soft fruit) <sup>1</sup> ( <i>n</i> = 8)                          | Olives, conserved fruit and soft fruit <sup>1</sup> ( <i>n</i> = 7) | Nuts <sup>2</sup> , apple sauce ( <i>n</i> = 5) |
| Energy intake rate <sup>1</sup>          | 26 (14–42) kcal/min                                                                | 39 (24–66) kcal/min                                                 | 83 (49–114) kcal/min                            |
| Eating rate <sup>1</sup>                 | 46 (26–73) g/min                                                                   | 52 (12–97) g/min                                                    | 39 (8–147) g/min                                |
| Energy density <sup>1</sup>              | 57 (45–78) kcal/100 g                                                              | 116 (29–326) kcal/100 g                                             | 494 (77–624) kcal/100 g                         |
| Dairy products ( <i>n</i> = 26)          |                                                                                    |                                                                     |                                                 |
| Description                              | Plain yoghurt and fromage frais <sup>2</sup> , cheese <sup>2</sup> ( <i>n</i> = 8) | Deserts other than plain yoghurt or fromage frais ( <i>n</i> = 8)   | Dairy drinks <sup>2</sup> ( <i>n</i> = 10)      |
| Energy intake rate <sup>1</sup>          | 54 (35–76) kcal/min                                                                | 98 (55–130) kcal/min                                                | 179 (48–422) kcal/min                           |
| Eating rate <sup>1</sup>                 | 58 (12–132) g/min                                                                  | 80 (33–122) g/min                                                   | 322 (71–527) g/min                              |

|                                              |                                                                         |                                                                                  |                                                     |
|----------------------------------------------|-------------------------------------------------------------------------|----------------------------------------------------------------------------------|-----------------------------------------------------|
| Energy density <sup>1</sup>                  | 187 (37–369) kcal/100 g                                                 | 154 (71–351) kcal/100 g                                                          | 55 (29–89) kcal/100 g                               |
| Cereals and cereal products ( <i>n</i> = 56) |                                                                         |                                                                                  |                                                     |
| Description                                  | Hard and dry products, plain bread slices <sup>2</sup> ( <i>n</i> = 23) | Other (e.g. bread with topping, buns, pasta, rice) <sup>2</sup> ( <i>n</i> = 33) |                                                     |
| Energy intake rate <sup>1</sup>              | 33 (9–62) kcal/min                                                      | 58 (25–131) kcal/min                                                             |                                                     |
| Eating rate <sup>1</sup>                     | 9 (2–13) g/min                                                          | 24 (10–54) g/min                                                                 |                                                     |
| Energy density <sup>1</sup>                  | 389 (234–542) kcal/100 g                                                | 254 (131–355) kcal/100 g                                                         |                                                     |
| Meat and meat products ( <i>n</i> = 18)      |                                                                         |                                                                                  |                                                     |
| Description                                  | Fresh meat (excluding minced meat) <sup>2</sup> ( <i>n</i> = 2)         | Minced meat <sup>2</sup> and processed meat ( <i>n</i> = 16)                     |                                                     |
| Energy intake rate <sup>1</sup>              | 42 (28–56) kcal/min                                                     | 72 (17–156) kcal/min                                                             |                                                     |
| Eating rate <sup>1</sup>                     | 27 (18–35) g/min                                                        | 29 (13–58) g/min                                                                 |                                                     |
| Energy density <sup>1</sup>                  | 158 (157–158) kcal/100 g                                                | 250 (124–435) kcal/100 g                                                         |                                                     |
| Fish and shellfish ( <i>n</i> = 6)           |                                                                         |                                                                                  |                                                     |
| Description                                  | Fish and fish products <sup>1</sup> ( <i>n</i> = 6)                     |                                                                                  |                                                     |
| Energy intake rate <sup>1</sup>              | 56 (29–89) kcal/min                                                     |                                                                                  |                                                     |
| Eating rate <sup>1</sup>                     | 31 (24–48) g/min                                                        |                                                                                  |                                                     |
| Energy density <sup>1</sup>                  | 182 (98–220) kcal/100 g                                                 |                                                                                  |                                                     |
| Eggs and egg products ( <i>n</i> = 1)        |                                                                         |                                                                                  |                                                     |
| Description                                  | Boiled egg <sup>1</sup> ( <i>n</i> = 1)                                 |                                                                                  |                                                     |
| Energy intake rate <sup>1</sup>              | 41 kcal/min                                                             |                                                                                  |                                                     |
| Eating rate <sup>1</sup>                     | 32 g/min                                                                |                                                                                  |                                                     |
| Energy density <sup>1</sup>                  | 128 kcal/100 g                                                          |                                                                                  |                                                     |
| Sugar and confectionery ( <i>n</i> = 19)     |                                                                         |                                                                                  |                                                     |
| Description                                  | Hard confectionary (non-chocolate), ice cream ( <i>n</i> = 5)           | Soft confectionary (non-chocolate) ( <i>n</i> = 6)                               | Chocolate, candy bars, fruit drinks ( <i>n</i> = 8) |
| Energy intake rate <sup>1</sup>              | 24 (15–37) kcal/min                                                     | 50 (33–66) kcal/min                                                              | 88 (44–146) kcal/min                                |
| Eating rate <sup>1</sup>                     | 9 (4–16) g/min                                                          | 14 (9–19) g/min                                                                  | 47 (8–268) g/min                                    |
| Energy density <sup>1</sup>                  | 321 (205–394) kcal/100 g                                                | 357 (320–428) kcal/100 g                                                         | 454 (54–562) kcal/100 g                             |
| Cakes ( <i>n</i> = 26)                       |                                                                         |                                                                                  |                                                     |
| Description                                  | Dry cakes, biscuits ( <i>n</i> = 15)                                    | Cakes, pies, pastries, puddings (non-milk based) ( <i>n</i> = 11)                |                                                     |
| Energy intake rate <sup>1</sup>              | 76 (40–164) kcal/min                                                    | 104 (57–152) kcal/min                                                            |                                                     |

|                                  |                                                          |                                                 |
|----------------------------------|----------------------------------------------------------|-------------------------------------------------|
| Eating rate <sup>1</sup>         | 17 (9–35) g/min                                          | 33 (18–58) g/min                                |
| Energy density <sup>1</sup>      | 443 (310–527) kcal/100 g                                 | 336 (196–446) kcal/100 g                        |
| Non-alcoholic beverages (n = 15) |                                                          |                                                 |
| Description                      | Non– and very low caloric beverages <sup>3</sup> (n = 5) | Caloric beverages (n = 10)                      |
| Energy intake rate <sup>1</sup>  | 0 (0–1) kcal/min                                         | 161 (22–330) kcal/min                           |
| Eating rate <sup>1</sup>         | 334 (56–635) g/min                                       | 365 (59–641) g/min                              |
| Energy density <sup>1</sup>      | 0 (0–1) kcal/100 g                                       | 41 (16–55) kcal/100 g                           |
| Alcoholic beverages (n = 1)      |                                                          |                                                 |
| Description                      | Pilsner beer (n = 1)                                     |                                                 |
| Energy intake rate <sup>1</sup>  | 47 kcal/min                                              |                                                 |
| Eating rate <sup>1</sup>         | 106 g/min                                                |                                                 |
| Energy density <sup>1</sup>      | 45 kcal/100 g                                            |                                                 |
| Condiments and sauces (n = 7)    |                                                          |                                                 |
| Description                      | Tomato sauces (n = 3)                                    | Mayonnaises and similar (n = 4)                 |
| Energy intake rate <sup>1</sup>  | 22 (19–27) kcal/min                                      | 63 (49–77) kcal/min                             |
| Eating rate <sup>1</sup>         | 28 (17–44) g/min                                         | 20 (11–31) g/min                                |
| Energy density <sup>1</sup>      | 89 (61–129) kcal/100 g                                   | 361 (235–664) kcal/100 g                        |
| Soups, bouillon (n = 7)          |                                                          |                                                 |
| Description                      | Soup from cube or package (n = 3)                        | Soup with more (semi-) solid components (n = 4) |
| Energy intake rate <sup>1</sup>  | 12 (9–18) kcal/min                                       | 33 (25–48) kcal/min                             |
| Eating rate <sup>1</sup>         | 89 (41–174) g/min                                        | 66 (59–70) g/min                                |
| Energy density <sup>1</sup>      | 20 (5–33) kcal/100 g                                     | 51 (35–80) kcal/100 g                           |
| Snacks (n = 6)                   |                                                          |                                                 |
| Description                      | Spring roll fried (n = 1)                                | Other warm savory snacks (n = 5)                |
| Energy intake rate <sup>1</sup>  | 49 kcal/min                                              | 118 (96–182) kcal/min                           |
| Eating rate <sup>1</sup>         | 27 g/min                                                 | 36 (27–51) g/min                                |
| Energy density <sup>1</sup>      | 181 kcal/100 g                                           | 327 (273–382) kcal/100 g                        |

<sup>1</sup> Recommended foods. <sup>2</sup> Both recommended and not recommended foods.
